# Supplementary material
Source: PubMed Central journal article supplement (PMC1865425)
Supplement: bmj_334_7600_950__1.pdf [file bmj_334_7600_950__1.pdf]

[posted as supplied by author]

#### Web references

- W1. Dunn D, Newell ML: **Vertical transmission of HIV**. *Lancet* 1992, **339**:364-365.
- W 2. Leroy V, Newell ML, Dabis F, Peckham C, Van de Perre P, Bulterys M, Kind C, Simonds RJ, Wiktor S, Msellati P: **International multicentre pooled analysis of late postnatal mother-to-child transmission of HIV-1 infection. Ghent International Working Group on Mother-to-Child Transmission of HIV**. *Lancet* 1998, **352**:597-600.
- W3. Bessinger R, Clark R, Kissinger P, Rice J, Coughlin S. Pregnancy is not associated with the progression of HIV disease in women attending an HIV outpatient program. *Am J Epidemiol* 1998; 147(5):434-40.
- W4. Burns DN, Landesman S, Minkoff H *et al*. The influence of pregnancy on human immunodeficiency virus type 1 infection: antepartum and postpartum changes in human immunodeficiency virus type 1 viral load. *Am J Obstet Gynecol* 1998; 178(2):355-9.
- W5. Weisser M, Rudin C, Battegay M, Pfluger D, Kully C, Egger M. Does pregnancy influence the course of HIV infection? Evidence from two large Swiss cohort studies. *J Acquir Immune Defic Syndr Hum Retrovirol* 1998; 17(5):404-10.
- W6. Ahdieh L. Pregnancy and infection with human immunodeficiency virus. *Clin Obstet Gynecol* 2001; 44(2):154-66.
- W7. Hocke C, Morlat P, Chene G, Dequae L, Dabis F. Prospective cohort study of the effect of pregnancy on the progression of human immunodeficiency virus infection. The Groupe d'Epidemiologie Clinique Du SIDA en Aquitaine. *Obstet Gynecol* 1995; 86(6):886-91.
- W8. Ladner J, Leroy V, Karita E, van de Perre P, Dabis F. Malaria, HIV and pregnancy. *AIDS* 2003; 17(2):275-6.
- W9. van Benthem BH, Vernazza P, Coutinho RA, Prins M. The impact of pregnancy and menopause on CD4 lymphocyte counts in HIV- infected women. *AIDS* 2002; 16(6):919-24.
- W10. Temmerman M, Nagelkerke N, Bwayo J, Chomba EN, Ndinya-Achola J, Piot P. HIV-1 and immunological changes during pregnancy: a comparison between HIV-1-seropositive and HIV-1-seronegative women in Nairobi, Kenya. *AIDS* 1995; 9(9):1057-60.

- W11. Ekpini RA, Nkengasong JN, Sibailly T *et al.* Changes in plasma HIV-1-RNA viral load and CD4 cell counts, and lack of zidovudine resistance among pregnant women receiving short-course zidovudine. *AIDS* 2002; 16(4):625-30.
- W12. McIntyre J. HIV in pregnancy-an obstetric blind spot. *SAJOG*, Nov, 2006, Vol.12, No.3
- W13. Lambert JS, Watts DH, Mofenson L *et al.* Risk factors for preterm birth, low birth weight, and intrauterine growth retardation in infants born to HIV-infected pregnant women receiving zidovudine. Pediatric AIDS Clinical Trials Group 185 Team. *AIDS* 2000; 14(10):1389-99.
- W14. Turner BJ, Newschaffer CJ, Cocroft J, Fanning TR, Marcus S, Hauck WW. Improved birth outcomes among HIV-infected women with enhanced Medicaid prenatal care. *Am J Public Health* 2000; 90(1):85-91.
- W15. Wei R, Msamanga GI, Spiegelman D *et al.* Association between low birth weight and infant mortality in children born to human immunodeficiency virus 1-infected mothers in Tanzania. *Pediatr Infect Dis J* 2004; 23(6):530-5.
- W16. Dreyfuss ML, Msamanga GI, Spiegelman D *et al.* Determinants of low birth weight among HIV-infected pregnant women in Tanzania. *Am J Clin Nutr* 2001; 74(6):814-26.
- W17. Gray RH, Wawer MJ, Serwadda D, Sewankambo N, Li C, Wabwire-Mangen F, Paxton L, Kiwanuka N, Kigozi G, Konde-Lule J, Quinn TC, Gaydos CA, McNairn D. Population-based study of fertility in women with HIV-1 infection in Uganda. *Lancet*.1998 Jan 10;351 (9096):98-103.
- W18. Nguyen RHN, Gray RH, Anderson JR, Minkoff H, Watts DH, Greenblatt R *et al.* Delayed conception among HIV-positive women in the Women's Interagency HIV Study (WIHS). (poster 193-S). 36<sup>th</sup> Annual Meeting of the Society for Epidemiological Research (SER). Atlanta, Georgia, June 11-14, 2003.
- W19. Marcollet A, Goffinet F, Firtion G *et al.* Differences in postpartum morbidity in women who are infected with the human immunodeficiency virus after elective cesarean delivery, emergency cesarean delivery, or vaginal delivery. *Am J Obstet Gynecol* 2002; 186(4):784-9.
- W20. Bjorklund K, Mutyaba T, Nabunya E, Mirembe F. Incidence of postcesarean infections in relation to HIV status in a setting with limited resources. *Acta Obstet Gynecol Scand* 2005; 84(10):967-71.
- W 21. Ferrero S, Bentivoglio G. Post-operative complications after caesarean section in HIV-infected women. *Arch Gynecol Obstet* 2003; 268(4):268-73.
